# Supplementary material for: Identification of Crosstalk between Phosphoprotein Signaling Pathways in RAW 264.7 Macrophage Cells
Source: PubMed Central journal article supplement (PMC2813256; doi:10.1371/journal.pcbi.1000654), 2010-01-29
Supplement: pcbi.1000654.s019.pdf [file pcbi.1000654.s019.pdf]

## F-test in K-fold Cross-Validation

The analysis and procedure presented below is based upon least-squares approach. Similar arguments hold true for the application of PLS as well, although the concept of degrees of freedom (DOF) is more complicated in PLS.

**Least-squares approach:** Let  $X$  and  $Y$  be the input and output data (single output), respectively. Let  $n$  be the number of data points and  $p$  be the number of input predictors. Let the model be:

$$Y = Xb + E \quad (1)$$

Then the least squares estimate of  $b$  is  $\hat{b} = (X^T X)^{-1} X^T Y$ . Predicted value of  $Y$  is  $\hat{Y} = X\hat{b} = X(X^T X)^{-1} X^T Y$  and the residual vector is  $E = Y - \hat{Y} = [I - X(X^T X)^{-1} X^T]Y$ . *Iff*  $\text{mean}(Y) = 0$  *then*  $\text{mean}(E) = 0$ . This constraint reduces the DOF of  $\sum_i e_i^2$  by 1. Further, we have,  $X^T E = X^T (Y - \hat{Y}) = X^T [I - X(X^T X)^{-1} X^T]Y = 0$  regardless of whether  $Y$  is mean-centered or not. These  $p$  constraints further reduce the DOF of  $\sum_i e_i^2$  by  $p$ . Thus, effective DOF of  $\sum_i e_i^2$  is  $(n - p - 1)$ .

In the application of K-fold CV, let  $n$  be the number of total data points and  $f$  be the number of folds ( $f = 10$  here) so that each fold contains  $m = n/f$  data points for the test set and  $m \times (f - 1)$  data points for the training set. Let  $p$  be the number of input predictors. Consider one output variable at a time. Let  $r_{ij}$  be the residual for the  $j$ th sample in  $i$ th fold in training set. Then,  $S_i = \sum_j r_{i,j}^2 \sim \chi_{m(f-1)-p-1}^2 (\forall i)$  is true. However, the distribution of  $S = \sum_i S_i = (\sum_i \sum_j r_{i,j}^2)$  is not clear because, out of all the  $f \times m \times (f - 1) = n \times (f - 1)$  samples in all the training sets of different folds, only  $n$  samples are truly independent.

In our F-test, we are computing the F-statistic as follows:

For the test sets:

$$S_{test,i} = \sum_j r_{test,i,j}^2; \quad DOF(S_{test,i}) = m; \quad S_{test} = \sum_i S_{test,i} = \sum_i \sum_j r_{test,i,j}^2; \quad DOF(S_{test}) = m * f \quad (2)$$

For the training sets:

$$S_{train,i} = \sum_j r_{train,i,j}^2; \quad DOF(S_{train,i}) = m \times (f - 1) - p - 1; \quad S_{train} = \sum_i S_{train,i} = \sum_i \sum_j r_{train,i,j}^2 \quad (3)$$

$m \times (f-1) \times f$  numbers of residual terms are included in  $S_{train}$  in which  $m \times f$  independent residual terms are repeated  $(f-1)$  times (approximately). Hence, the statistic  $S_{train}/(f-1)$  contains  $m \times f$  independent residual terms and follows chi-square distribution with  $DOF(S_{train}/(f-1)) \approx m \times f$ . Thus, the statistic  $F$  follows,

$$F = \frac{S_{test}/(m \times f)}{(S_{train}/(f-1))/(m \times f)} = \frac{S_{test}/(m \times f)}{S_{train}/(m \times (f-1) \times f)} \quad (4)$$

The denominator in the above expression does not include any effect of the number of input variables  $p$ . The effect of  $p$  can be achieved by considering the statistic

$$F = \frac{S_{test}/(m \times f)}{S_{train}/((m \times (f-1) - p - 1) \times f)} \quad (5)$$

So, the equivalent DOF is,  $DOF_{train} = (m \times (f-1) - p - 1) \times f / (f-1)$ . Hence,  $F \sim F(n, DOF_{train})$  and, we have tested the hypothesis for the significance level,  $\alpha$ :

$$\begin{aligned} H_0 : F &< F_\alpha(n, DOF_{train}) \\ H_1 : F &> F_\alpha(n, DOF_{train}) \end{aligned} \quad (6)$$

where  $F_\alpha(n_1, n_2)$  denotes inverse cumulative F-distribution value for DOF  $n_1$  and  $n_2$  at the significance level of  $\alpha$ .
